# Supplementary material for: Mesostructured Fibrils Exfoliated in Deep Eutectic Solvent as Building Blocks of Collagen Membranes
Source: MDPI journal article supplement (doi:10.3390/polym15194008), 2023-10-06
Supplement: s1 [file s1]

# Mesostructured Fibrils Exfoliated in Deep Eutectic Solvent as Building Blocks of Collagen Membranes

Ying Pei <sup>1,2,3,\*</sup>, Wei Li <sup>3</sup>, Lu Wang <sup>3</sup>, Jing Cui <sup>4</sup>, Lu Li <sup>1</sup>, Shengjie Ling<sup>4,\*</sup>, Keyong Tang <sup>3</sup> and Huaifeng Tian <sup>2,\*</sup>

<sup>1</sup> Key Laboratory of Auxiliary Chemistry and Technology for Chemical Industry, Ministry of Education, Shaanxi University of Science and Technology, Xi'an 710021, China; lilu@sust.edu.cn

<sup>2</sup> Key Laboratory of Processing and Quality Evaluation Technology of Green Plastics of China National Light Industry Council, Beijing Technology and Business University, Beijing 100048, China

<sup>3</sup> College of Materials Science and Engineering, Zhengzhou University, Zhengzhou 450001, China; lw15565152810@126.com (W.L.); 18839150063@163.com (L.W.); kytangzzu@126.com (K.T.)

<sup>4</sup> School of Physical Science and Technology, Shanghai Tech University, Shanghai 201210, China; cuijing@shanghaitech.edu.cn

\* Correspondence: peiying@zzu.edu.cn (Y.P.); lingshj@shanghaitech.edu.cn (S.L.); tianhuaifeng@th.btbu.edu.cn (H.T.)

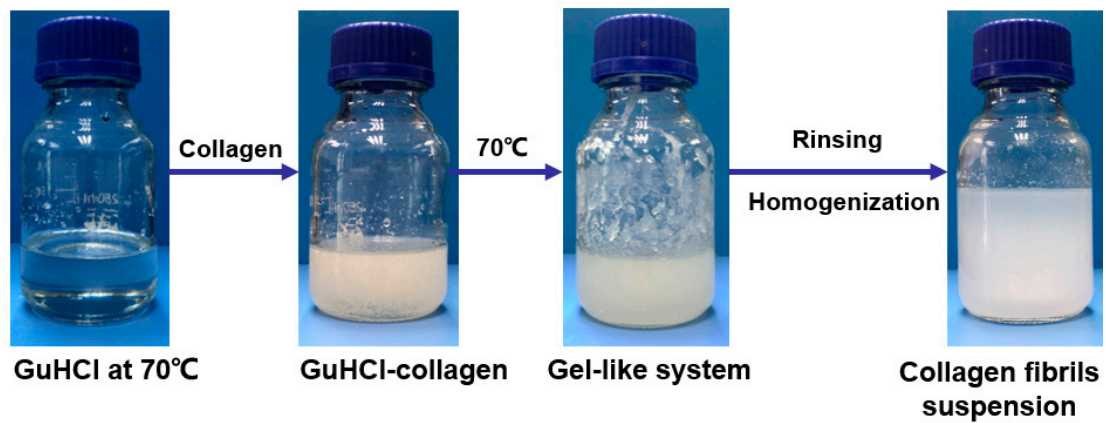

Figure S1 Schematic diagram of the experimental process.

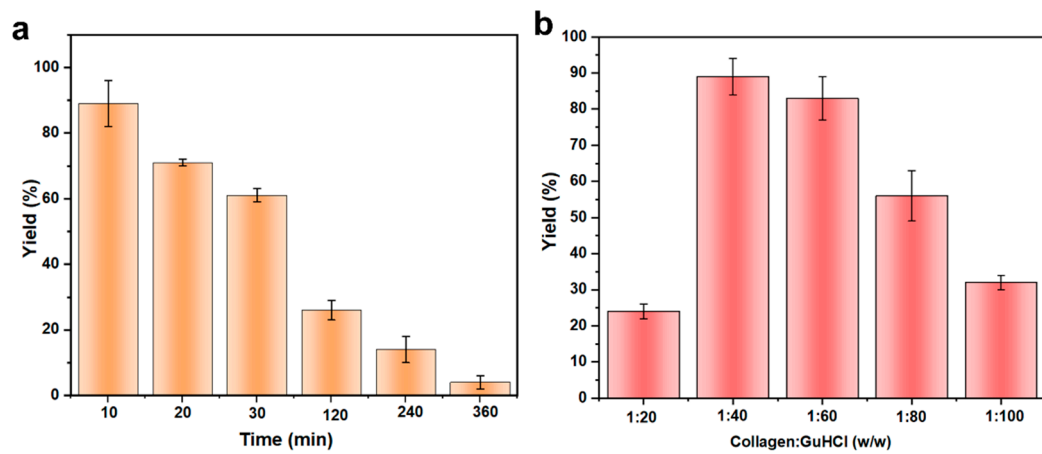

Figure S2 The effects of contacting time (a) and (b) the weight ratio (collagen: GuHCl, w:w) on the yield of collagen fibrils.

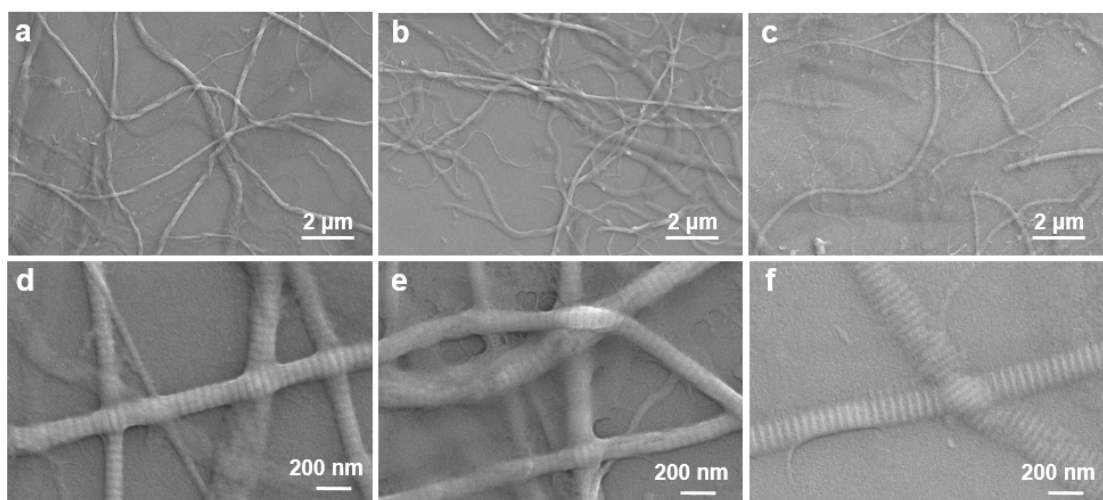

Figure S3 SEM images of collagen fibrils after homogenization for 5 (a, d), 20 (b, e) and 30 (c, f) times.

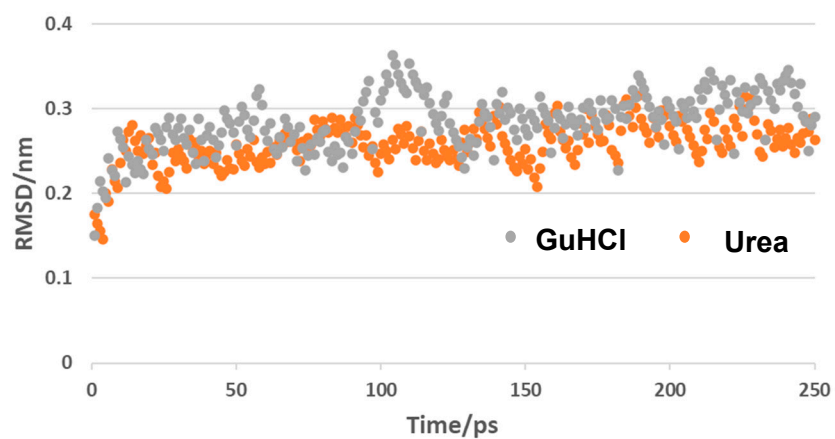

Figure S4 Effects of GuHCl and urea on the root mean square deviation (RMSD) of collagen molecules as a function of simulation time.

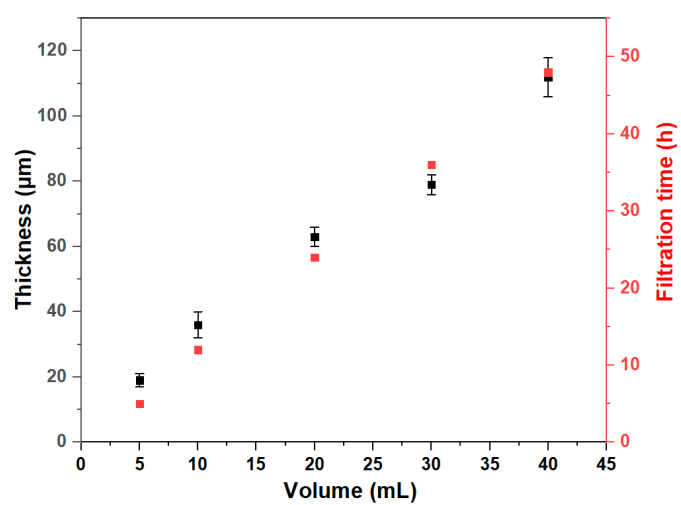

Figure S5 Dependence of CFs suspension volumes on the thickness of collagen membranes and filtration time.

Table S1 Diameter, length and aspect ratio of collagen fibrils by SEM Morphology analysis

| Sample | Diameter (nm)      | Length ( $\mu\text{m}$ ) | Aspect ratio |
|--------|--------------------|--------------------------|--------------|
| CFs-5  | 145.23 $\pm$ 14.25 | 62.31 $\pm$ 11.30        | 320-557      |
| CFs-20 | 123.15 $\pm$ 6.55  | 34.31 $\pm$ 8.30         | 201-358      |
| CFs-30 | 112.44 $\pm$ 9.86  | 15.74 $\pm$ 6.30         | 74-203       |

Table S2 Average mechanical data of dry and hydrated collagen membranes.

| Sample  | Dry state       |                 | Hydrated state   |                 |
|---------|-----------------|-----------------|------------------|-----------------|
|         | Ultimate stress | Ultimate strain | Ultimate stress  | Ultimate strain |
|         | (MPa)           | (%)             | (kPa)            | (%)             |
| M-5     | $70.4 \pm 0.9$  | $20 \pm 7$      | $270.2 \pm 14.2$ | $102 \pm 9$     |
| M-20    | $87.6 \pm 1.7$  | $15 \pm 5$      | $80.3 \pm 5.3$   | $68 \pm 3.2$    |
| M-30    | $112.5 \pm 2.5$ | $9 \pm 4$       | $27.6 \pm 4.4$   | $40 \pm 4.9$    |
| Control | $45.1 \pm 1.5$  | $27 \pm 3$      | $450 \pm 13.2$   | $17 \pm 5.1$    |

Table S3 The tensile ultimate stress of reported collagen membranes and this work samples

| Initial object                 | Processing methods | Ultimate stress<br>(dry state, MPa) | Ultimate stress<br>(hydrated state, kPa) | Ref.         |
|--------------------------------|--------------------|-------------------------------------|------------------------------------------|--------------|
| Collagen solution              | Casting            | $10.0 \pm 0.50$                     |                                          | [49]         |
| Collagen solution              | Casting            | $49.2 \pm 7.10$                     |                                          | [50]         |
| Collagen solution              | Casting            |                                     | $100 \pm 3.00$                           | [51]         |
| Collagen solution              | Filtration         |                                     | $1.49 \pm 0.90$                          | [52]         |
| Collagen fibrils<br>suspension | Filtration         | $59.1 \sim 111$                     | $20 \sim 450$                            | This<br>work |
